# Supplementary material for: Novel prokaryotic expression of thioredoxin-fused insulinoma associated protein tyrosine phosphatase 2 (IA-2), its characterization and immunodiagnostic application
Source: PubMed Central journal article supplement (PMC5122161; doi:10.1186/s12896-016-0309-2), 2016-11-24
Supplement: 12896_2016_309_MOESM2_ESM.pdf [file 12896_2016_309_MOESM2_ESM.pdf]

**A.**MWM  
(kDa)**1****2****3**

97,0

66,0

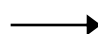

45,0

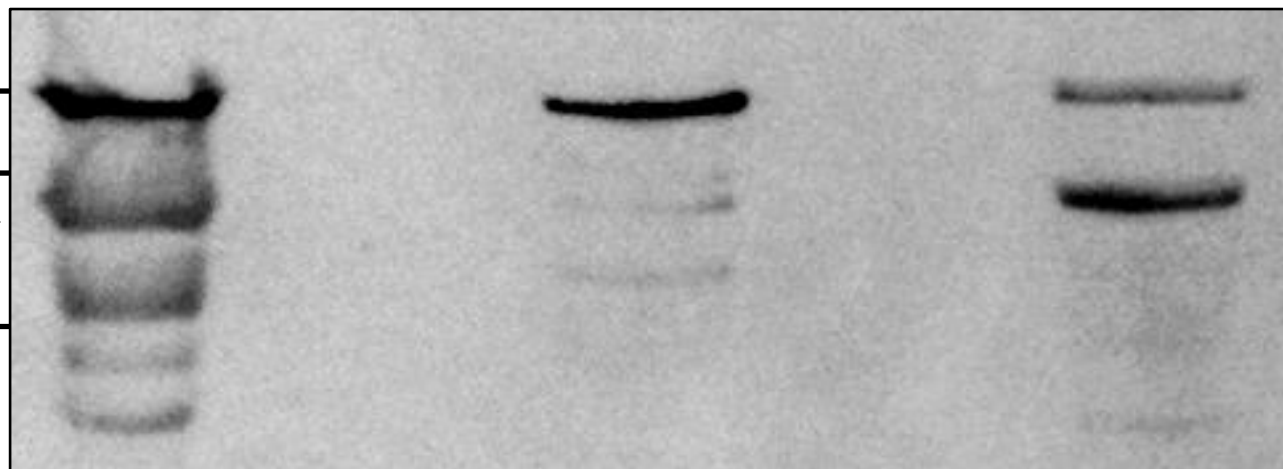**B.**MWM  
(kDa)**1**

97,0

66,0

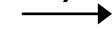

45,0

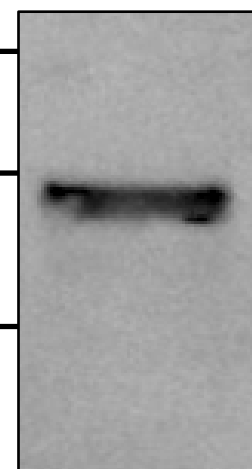

**Figure S2. TrxIA-2<sub>ic</sub> identification by western blot in eluted fractions from size exclusion chromatography and dithiothreitol reduction analysis.**
