# Supplementary material for: Novel prokaryotic expression of thioredoxin-fused insulinoma associated protein tyrosine phosphatase 2 (IA-2), its characterization and immunodiagnostic application
Source: PubMed Central journal article supplement (PMC5122161; doi:10.1186/s12896-016-0309-2), 2016-11-24
Supplement: 12896_2016_309_MOESM5_ESM.pdf [file 12896_2016_309_MOESM5_ESM.pdf]

**A.**MWM  
(kDa)

1 2 3 4

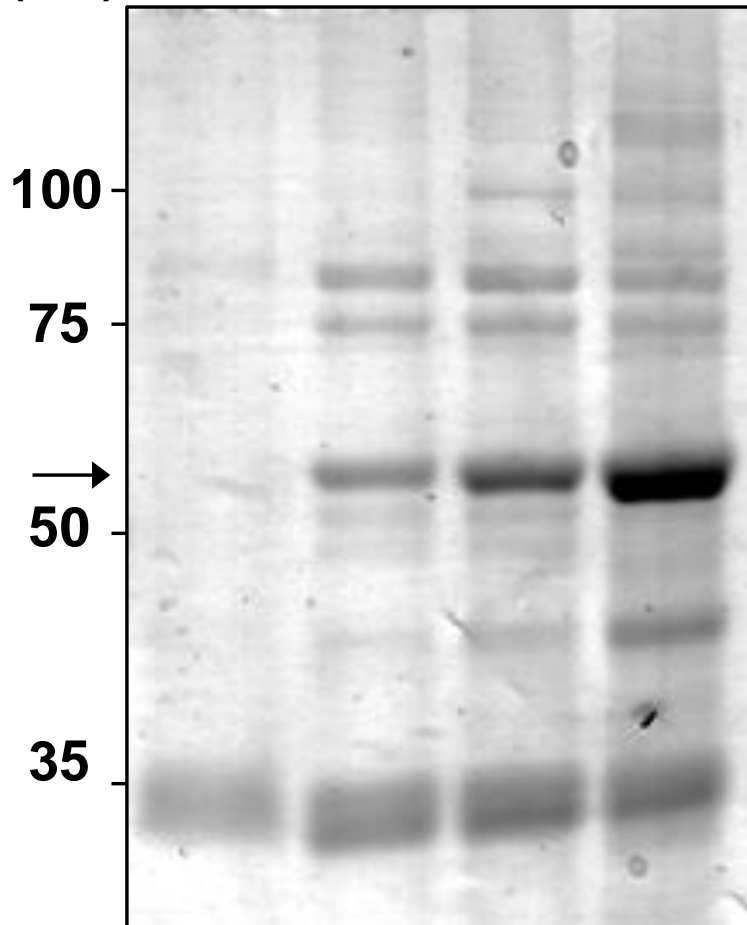**B.**MWM  
(kDa)

1 2 3 4

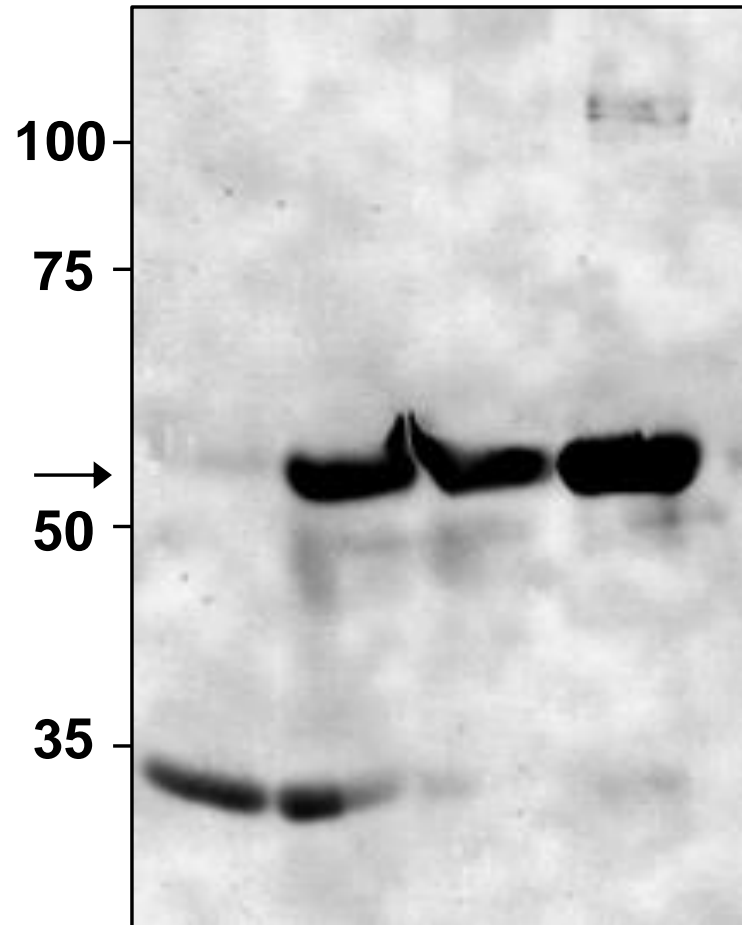

Figure S5. IA-2<sub>ic</sub> expression as a fusion protein with Trx in *E. coli* GI724 inclusion bodies.
