# Supplementary material for: Novel prokaryotic expression of thioredoxin-fused insulinoma associated protein tyrosine phosphatase 2 (IA-2), its characterization and immunodiagnostic application
Source: PubMed Central journal article supplement (PMC5122161; doi:10.1186/s12896-016-0309-2), 2016-11-24
Supplement: 12896_2016_309_MOESM6_ESM.pdf [file 12896_2016_309_MOESM6_ESM.pdf]

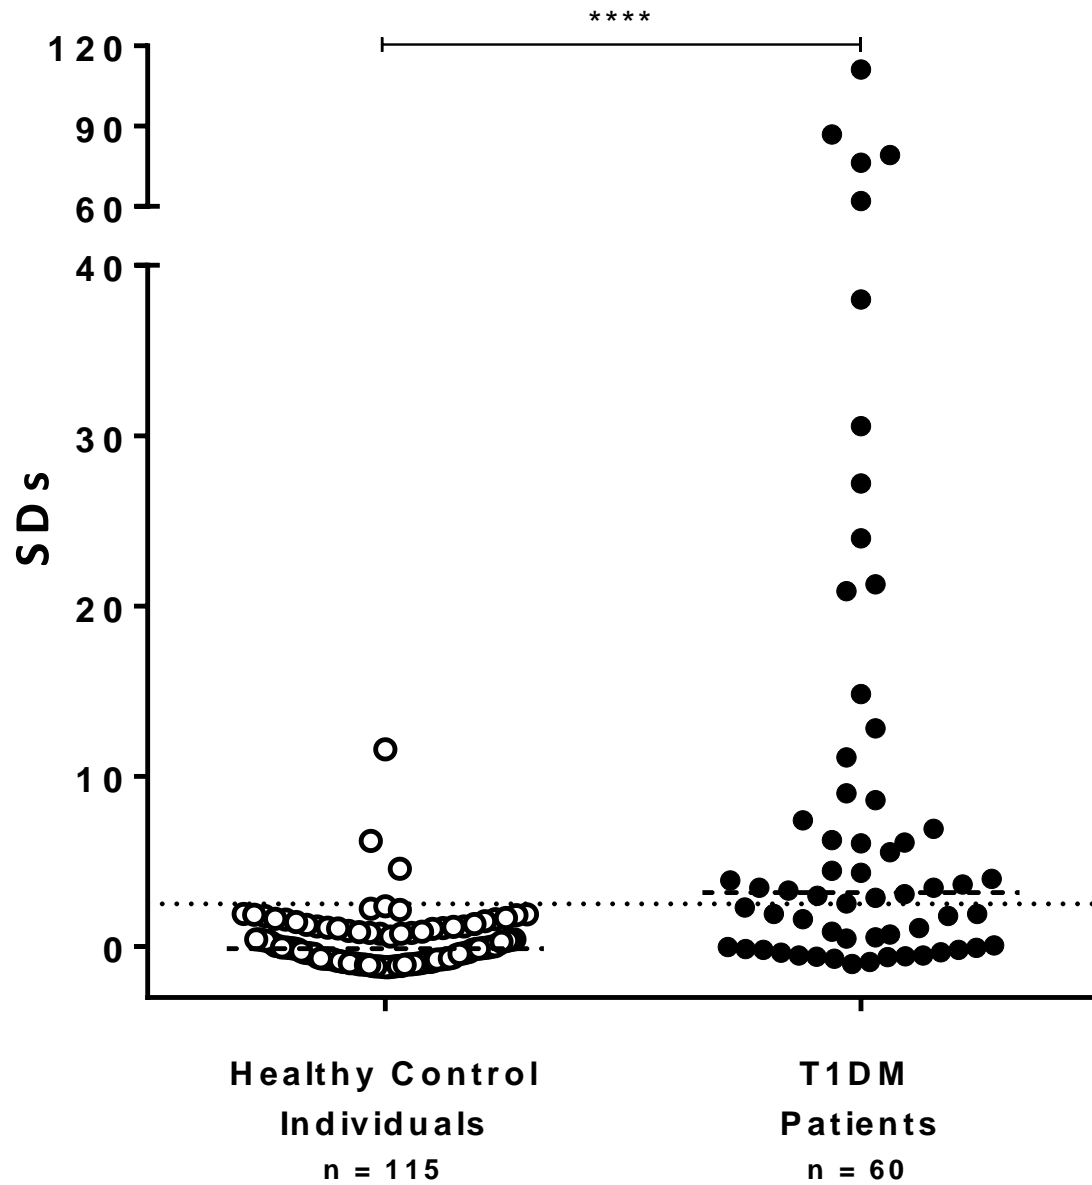

**Figure S6. CL-b ELISA for IA-2A assessment in 115 healthy control and 60 Type 1 diabetic patient sera.**
